# Supplementary material
Source: Springer Nature journal article supplement (https://www.springermedizin.de/resource/supplementary/12958_2012_984_MOESM2_ESM.pdf/9566564)

**FSH level**

|                                    | Day of HCG | D11   | D9    | D7    | D3   |
|------------------------------------|------------|-------|-------|-------|------|
| Group 1-A rfsH +low dose hCG < 40y | 14.35      | 14.32 | 14.52 | 13.33 | 5.38 |
| Group 2-A Rfsh < 40y               | 14.38      | 14.73 | 14.66 | 13.52 | 5.78 |

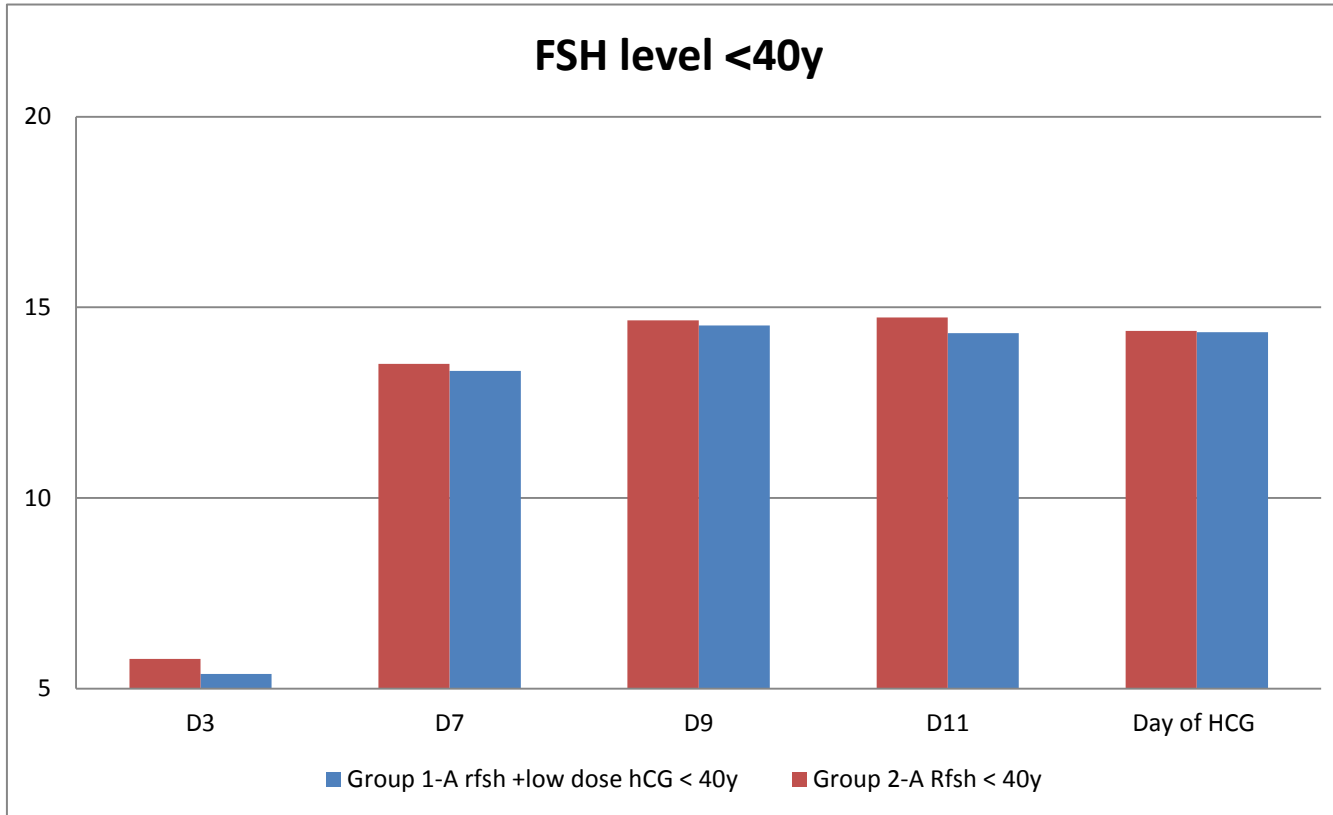

Supplement: MOESM2 [file 9566564]
